# Supplementary material for: Pharmacogenomic‐based personalized medicine: Multistakeholder perspectives on implementational drivers and barriers in the Canadian healthcare system
Source: PubMed Central journal article supplement — Clin Transl Sci. 2021 Jul 16;14(6):2231–41. doi: 10.1111/cts.13083 (PMC8604218; doi:10.1111/cts.13083), 2021-07-16
Supplement: CTS-14-2231-s001.pdf [file CTS-14-2231-s001.pdf]

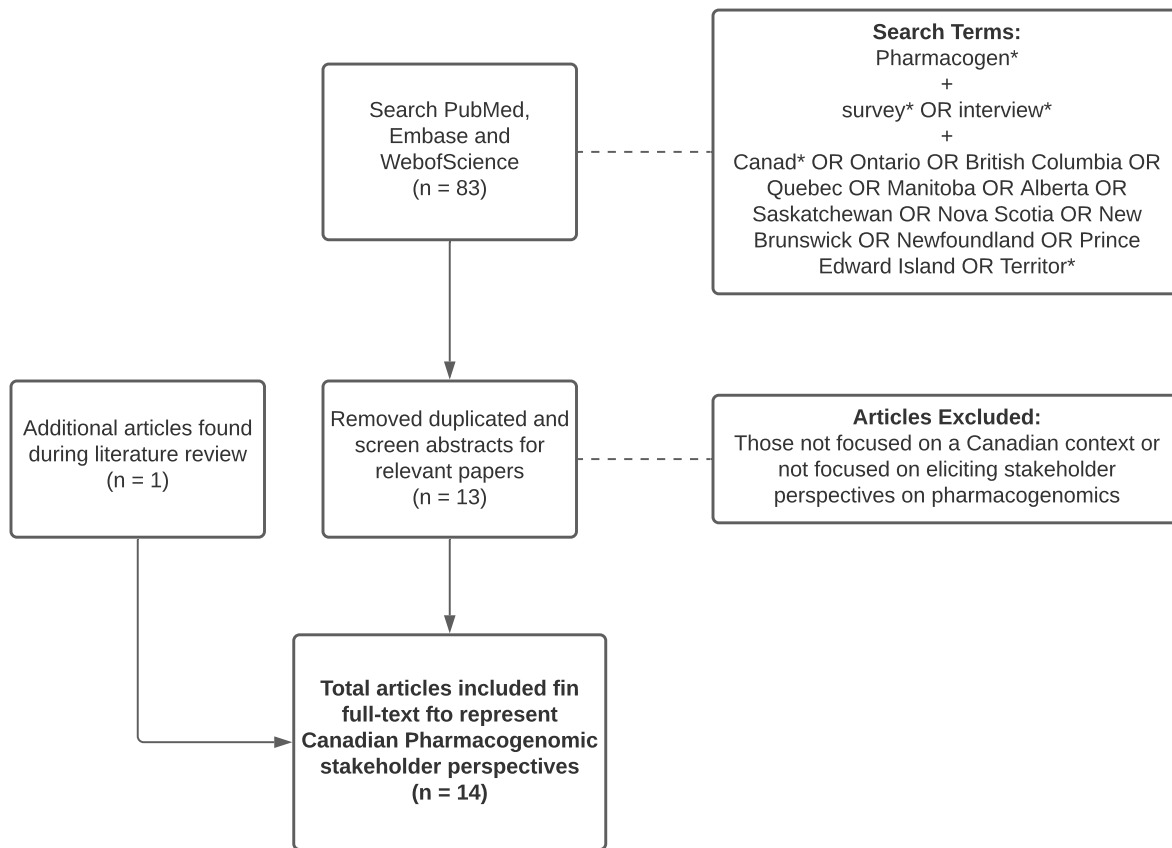

**Figure S1.** Workflow to review Canadian pharmacogenomics literature on stakeholder perspectives. Databases searched included, PubMed, Embase and Web of Science. Total number of articles included was 14 articles; after removing duplicates, removing not relevant, and including additional papers found.

## Pre-Testing

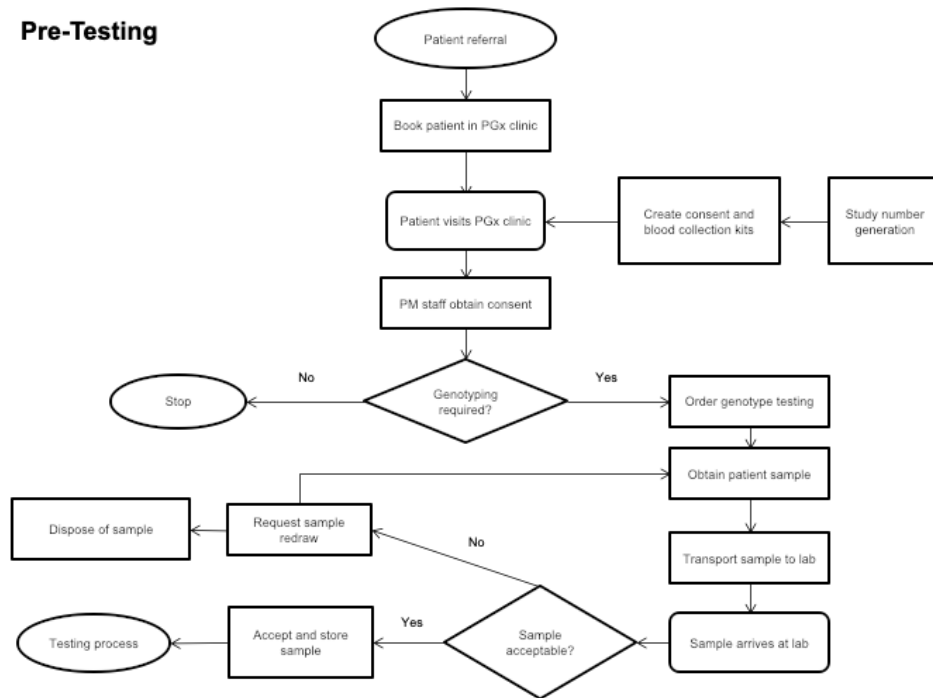

## Post-Testing

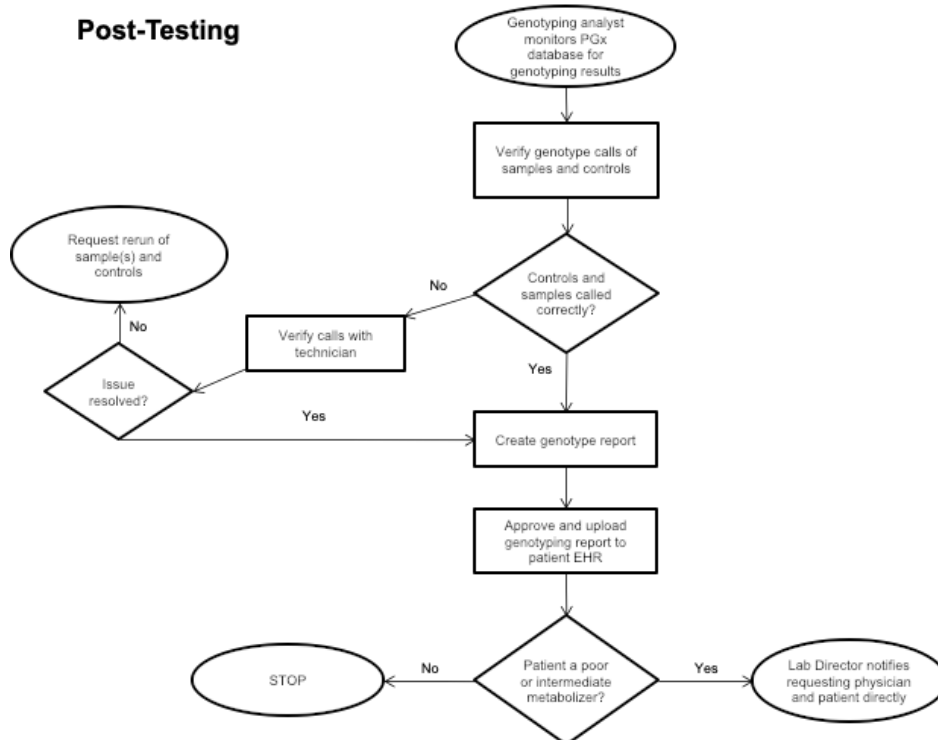

**Figure S2.** LHSC PGx pre-testing and post-testing workflow. Genotyping follows a standardized process. Each individual step has an accompanying individual standard operating procedure to ensure consistency and accountability.
